# Supplementary material for: Development of on-line molecularly imprinted solid phase extraction-liquid chromatography-mass spectrometry for triazine analysis in corn samples
Source: Royal Society of Chemistry journal article supplement (doi:10.1039/c5ay02986d), 2016-01-01
Supplement: c5ay02986d1.pdf [file c5ay02986d1.pdf]

**Supporting information online**

**Development of an on-line molecularly imprinted solid phase extraction by liquid chromatography-mass spectrometry for triazine analysis in corn samples**

Felipe Nascimento Andrade, Carlos Eduardo Domingues Nazario, Álvaro José Santos-Neto; Fernando Mauro Lanças\*

*University of Sao Paulo, Institute of Chemistry of Sao Carlos, 13560-970 Sao Carlos, SP, Brazil.*

*Keywords:* Triazines, Corn, Molecularly imprinted polymers, On-line solid phase extraction, Liquid chromatography coupled to mass spectrometer.

Correspondence: Dr. Fernando Mauro Lanças,  
University of Sao Paulo, Institute of Chemistry of Sao Carlos, Postal Code 780,  
13560-970 Sao Carlos, SP, Brazil  
E-mail: flancas@iqsc.usp.br  
Fax: +55-16-3373-9983

## Figures

**Figure S1** - Pareto chart of simetryn used for assessing the effect of different variables of MISPE (Molecularly Imprinted Solid Phase Extraction) – LC, length column; ET, extraction time; VB, .

**Figure S2** - Atrazine surface response obtained from Doehlert. The signal intensity was considered as response. Variables: extraction time vs. column length.

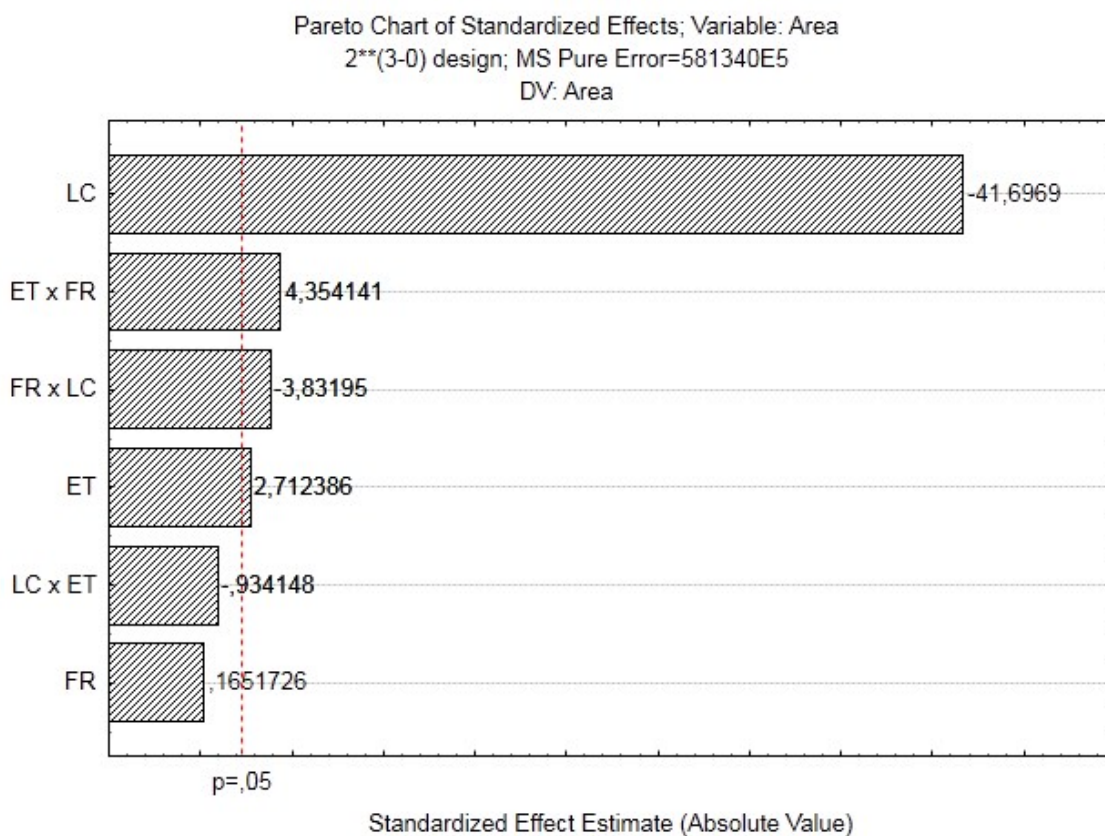

**Fig. S1**

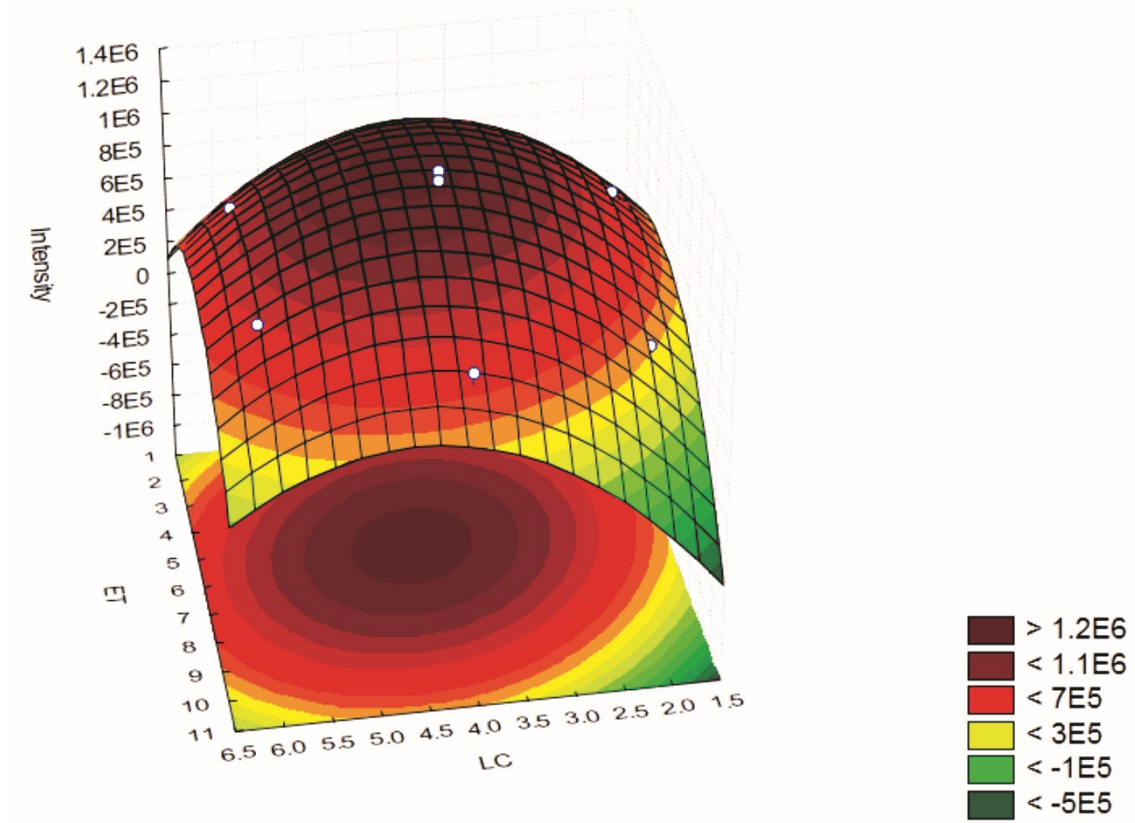

Fig. S2
